# Supplementary material for: Expression Analysis of Fibronectin Type III Domain-Containing (FNDC) Genes in Inflammatory Bowel Disease and Colorectal Cancer
Source: Hindawi journal article supplement (doi:10.1155/2019/3784172), 2019-04-09
Supplement: f1 [file 3784172.f1.pdf]

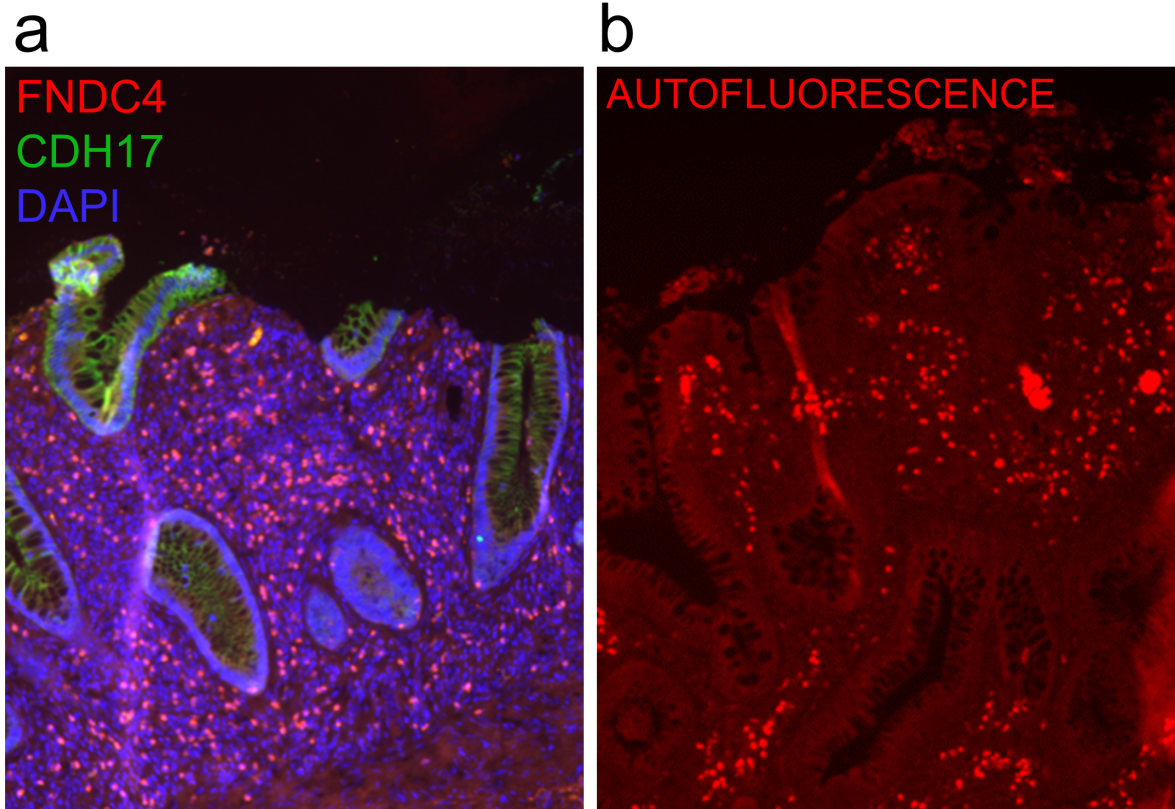

**Supplemental figure: Immunofluorescence staining and autofluorescence of inflamed intestinal tissue.** a) a subepithelial cellular IF label is visible with the use of 1<sup>st</sup> antibody: Anti-FND4 (HPA015804, dilution 1:50, Sigma-Aldrich) and 2<sup>nd</sup> antibody: Goat Anti-Rabbit IgG H&L (Alexa Fluor® 594) (ab150080, dilution 1:200, Abcam). Colonic crypts are labeled by Cadherin-17 antibody (MAB1032, R&D Systems) with 2<sup>nd</sup> antibody Goat Anti-Mouse IgG FITC (F0257, dilution 1:250, Sigma-Aldrich). DAPI was used for counterstaining. b) the subepithelial cellular label also appears in a labeling control without antibodies after an excitation with 594nm and is therefore autofluorescence.
